# Supplementary material for: Homotypic and heterotypic adhesion of cancer cells revealed by force-induced remnant magnetization spectroscopy
Source: Royal Society of Chemistry journal article supplement (doi:10.1039/d2nh00410k), 2023-01-01
Supplement: d2nh00410k2.pdf [file d2nh00410k2.pdf]

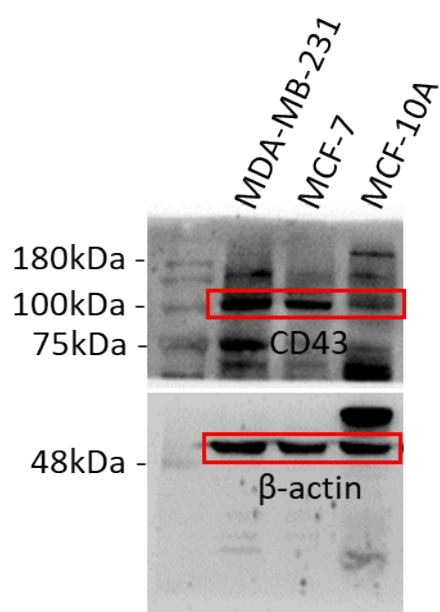

**Figure.** Raw Images for Western Blot in Fig. 5c

In order to incubate CD43 antibody and  $\beta$ -actin antibody separately, we cropped the membrane into two parts and performed subsequent procedures.
